# Supplementary material
Source: PubMed Central journal article supplement (PMC4432172)
Supplement: AAC.05152-14_zac006154027so1.pdf [file AAC.05152-14_zac006154027so1.pdf]

1 Supplementary Information: Glutaraldehyde resistance mechanisms in *Pseudomonas fluorescens*  
2 and *Pseudomonas aeruginosa* biofilms

3 Amit Vikram<sup>1</sup>, Jennifer Bomberger<sup>2</sup>, Kyle J. Bibby<sup>1,3#</sup>

4

5 <sup>1</sup>Department of Civil and Environmental Engineering, <sup>2</sup>Department of Microbiology and  
6 Molecular Genetics and <sup>3</sup>Department of Computational and Systems Biology, University of  
7 Pittsburgh, Pittsburgh, PA 15261, USA

8

9 #Address correspondence to Kyle J. Bibby, 709 Benedum Hall, Pittsburgh, PA 15261  
10 BibbyKJ@pitt.edu, Phone: 412-624-9207 Fax: 412-624-0135

11

12

13

14 Figure S1. Effect of glutaraldehyde exposure on *P. fluorescens* biofilm formation as measured by  
 15 crystal violet. *P. fluorescens* biofilms grown to 24h or 72h were washed three times and stained  
 16 with 0.3 % crystal violet for 20 min. The stain was washed and dissolved with 200  $\mu$ l of DMSO  
 17 and plates were read at 570 nm. Mean  $\pm$ SD of three biological replicates are presented.

18

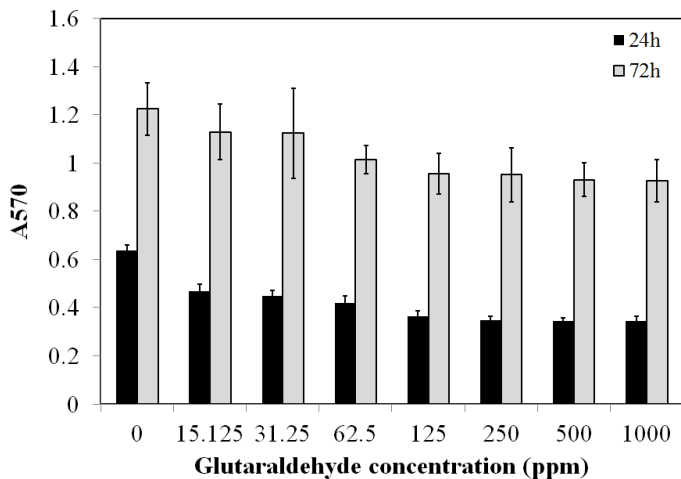

19

20 Figure S2: Effect of glutaraldehyde on *P. fluorescens* biofilm viability. *P. fluorescens* biofilms  
 21 were grown for 72 h and washed three times and treated with indicated concentrations of  
 22 glutaraldehyde for 10 min. Following exposure, the biofilms were washed, briefly sonicated to  
 23 disperse the cells and serially diluted in PBS. The serial dilutions were plated on cetrimide agar  
 24 plates and incubated at 25 °C. The colonies were counted after 24 h and presented as cfu/ml. Star  
 25 denotes significant difference from control (PBS).

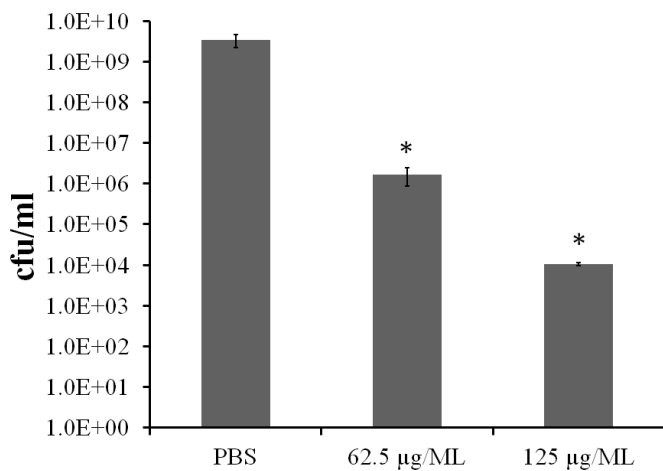

26

27

28 Table S1. Sequence of the primers used in the study to amplify selected genes using qPCR

| Gene        | Forward primer       | Reverse primer       |
|-------------|----------------------|----------------------|
| <i>rpoD</i> | CTGATCCAGGAAGGCAACAT | TGAGCTTGTTGATCGTCTCG |
| PFLU2929    | CGTCGAGCAGTACCAGGAAG | GAGAACGCCTTCAGCGACTA |
| PFLU3876    | ATGCCATCGACGTTGCTGTA | GCAACGTGGTGGAAATCAC  |
| <i>gyrA</i> | CTCCCGGTCAATATCGAAGA | GATCACGTCACCGACAACAC |

29

30

31 Table S2: Summary of RNA sequencing run.

32

| Sample                                    | Replicate 1 |       | Replicate 2 |       |
|-------------------------------------------|-------------|-------|-------------|-------|
|                                           | PBS         | Glut  | PBS         | Glut  |
| Data generated (GB)                       | 1.49        | 1.35  | 1.18        | 1.40  |
| Total read count (million)                | 8.03        | 7.28  | 5.89        | 7.34  |
| Percent reads aligned to coding sequences | 70.52       | 70.87 | 73.44       | 72.42 |
| Percent reads mapped to intergenic region | 29.48       | 29.13 | 26.56       | 27.58 |
| Average coverage                          | 65.88       | 62.78 | 70.32       | 66.85 |

33 

---

 PBS = Phosphate Buffered Saline exposed biofilm; Glut= Glutaraldehyde exposed biofilm

34

35

36

37 Table S3: List of differentially regulated genes in *Pseudomonas fluorescens* SBW25 upon 62.5  
 38 mg/L glutaraldehyde exposure. The differentially regulated genes were determined through  
 39 RNA-seq experiment. The raw reads were exported into CLC Genomics workbench 6.5.1,  
 40 trimmed and mapped to *P. fluorescens* SBW25 genome (Genbank accession NC\_012660).  
 41 RPKM values were calculated after depletion of reads mapping to 16s and data was further  
 42 normalized using scaling. Differentially expressed genes were identified using Baggerly's test on  
 43 proportions.

| Gene Name                                                           | Gene title                                           | Fold change | p-value (FDR correction) |
|---------------------------------------------------------------------|------------------------------------------------------|-------------|--------------------------|
| <b>Amino acid transport and metabolism</b>                          |                                                      |             |                          |
| PFLU4644                                                            | putative racemase                                    | 2.08        | 0.047                    |
| PFLU0811                                                            | putative ornithine decarboxylase                     | 2.23        | 0.003                    |
| PFLU2793                                                            | putative aminotransferase                            | 2.28        | 0.004                    |
| PFLU0293                                                            | agmatine deiminase                                   | 2.29        | 0.000                    |
| PFLU1724                                                            | hypothetical protein                                 | 2.66        | 0.010                    |
| PFLU4022                                                            | putative allophanate hydrolase subunit 2             | 2.84        | 0.043                    |
| PFLU5634                                                            | putative amino acid ABC transporter membrane protein | 3.00        | 0.005                    |
| <b>Carbohydrate transport and metabolism</b>                        |                                                      |             |                          |
| PFLU4690                                                            | putative sugar kinase                                | -14.00      | 0.049                    |
| PFLU3274                                                            | putative permease transmembrane protein              | 2.12        | 0.024                    |
| PFLU1483                                                            | hypothetical protein                                 | 2.67        | 0.002                    |
| PFLU5810                                                            | putative cation ABC transporter membrane protein     | 3.97        | 0.001                    |
| PFLU4810                                                            | putative gluconate permease                          | 2.37        | 0.025                    |
| <b>Cell division and chromosome partitioning</b>                    |                                                      |             |                          |
| PFLU5545                                                            | putative peptidase                                   | 2.08        | 0.004                    |
| <b>Cell envelope biogenesis, outer membrane</b>                     |                                                      |             |                          |
| PFLU3876                                                            | putative multidrug resistance protein A              | 2.21        | 0.000                    |
| PFLU2929                                                            | outer membrane component of multidrug efflux system  | 14.85       | 0.000                    |
| <b>Cell motility and secretion / Signal transduction mechanisms</b> |                                                      |             |                          |
| PFLU3484                                                            | two-component system response regulator              | -53.33      | 0.004                    |
| PFLU3379                                                            | methyl-accepting chemotaxis protein                  | 6.51        | 0.000                    |
| <b>Coenzyme metabolism</b>                                          |                                                      |             |                          |
| PFLU4036                                                            | putative 4-aminobutyrate aminotransferase            | 2.73        | 0.006                    |
| <b>Defense mechanisms</b>                                           |                                                      |             |                          |
| PFLU4976                                                            | putative HlyD family secretion protein               | -13.06      | 0.048                    |
| <b>DNA replication, recombination, and repair</b>                   |                                                      |             |                          |
| PFLU3785                                                            | hypothetical protein                                 | 2.02        | 0.000                    |
| PFLU0148A                                                           | putative transposase                                 | 2.28        | 0.000                    |

|                                                                     |                                                              |       |       |
|---------------------------------------------------------------------|--------------------------------------------------------------|-------|-------|
| PFLU2138                                                            | putative DNA helicase                                        | 2.69  | 0.049 |
| <b>Energy production and conversion</b>                             |                                                              |       |       |
| PFLU2399                                                            | putative oxidoreductase                                      | 4.98  | 0.002 |
| PFLU1891                                                            | putative cytochrome C oxidase (monoheme and diheme subunits) | 5.27  | 0.006 |
| PFLU4680                                                            | putative NADP-dependent alcohol dehydrogenase                | 3.21  | 0.000 |
| <b>Inorganic ion transport and metabolism</b>                       |                                                              |       |       |
| PFLU0201                                                            | putative ABC sulfur transporter substrate-binding protein    | 2.20  | 0.005 |
| dgoT                                                                | D-galactonate transporter                                    | 2.48  | 0.004 |
| phnD                                                                | phosphonate ABC transporter substrate-binding protein        | 2.49  | 0.005 |
| PFLU1868                                                            | putative ABC transporter ATP-binding protein                 | 5.81  | 0.000 |
| PFLU2340                                                            | putative polyamine ABC transporter ATP-binding protein       | 8.56  | 0.004 |
| ccmD                                                                | cytochrome C biogenesis, heme exporter protein               | -∞    | 0.008 |
| <b>Lipid metabolism</b>                                             |                                                              |       |       |
| PFLU0450                                                            | putative acyl-CoA dehydrogenase                              | 2.03  | 0.000 |
| PFLU5785                                                            | hypothetical protein                                         | 2.04  | 0.002 |
| PFLU2771                                                            | putative NAD(P)H dehydrogenase                               | 14.06 | 0.040 |
| <b>Nucleotide transport and metabolism</b>                          |                                                              |       |       |
| phnN                                                                | phosphorous compounds metabolism-related ATP-binding protein | -9.15 | 0.048 |
| PFLU0493                                                            | putative membrane transporter-like permease                  | 2.45  | 0.000 |
| <b>Posttranslational modification, protein turnover, chaperones</b> |                                                              |       |       |
| PFLU5638                                                            | putative glutathione S-transferase                           | -8.39 | 0.042 |
| PFLU4465                                                            | hypothetical protein                                         | 2.01  | 0.000 |
| <b>Secondary metabolites biosynthesis, transport and catabolism</b> |                                                              |       |       |
| PFLU4766                                                            | acetyl-CoA synthetase                                        | -7.77 | 0.000 |
| PFLU0029                                                            | hypothetical protein                                         | -3.27 | 0.005 |
| PFLU4179                                                            | putative oxidoreductase                                      | 2.03  | 0.003 |
| <b>Signal transduction mechanisms</b>                               |                                                              |       |       |
| PFLU5625                                                            | hypothetical protein                                         | -4.94 | 0.004 |
| PFLU2125                                                            | putative methyl-accepting chemotaxis protein                 | 3.19  | 0.019 |
| PFLU3016                                                            | putative two-component response regulator                    | 2.53  | 0.000 |
| <b>Transcription</b>                                                |                                                              |       |       |
| PFLU4745                                                            | hypothetical protein                                         | 2.29  | 0.000 |
| PFLU4114                                                            | putative AsnC family transcriptional regulator               | 2.44  | 0.001 |
| PFLU3910                                                            | putative transcriptional regulator                           | 2.64  | 0.000 |
| PFLU0565                                                            | TetR family transcriptional regulator                        | 3.45  | 0.000 |
| PFLU0136                                                            | putative MarR family regulatory protein                      | 4.51  | 0.009 |
| PFLU2397                                                            | TetR family transcriptional regulator                        | 18.56 | 0.001 |
| PFLU3981                                                            | GntR family transcriptional regulator                        | 2.22  | 0.024 |

| <b>Translation, ribosomal structure and biogenesis</b> |                                                                                                                                        |        |       |
|--------------------------------------------------------|----------------------------------------------------------------------------------------------------------------------------------------|--------|-------|
| rpmC                                                   | 50S ribosomal protein L29                                                                                                              | 2.28   | 0.000 |
| ftr                                                    | ribosome recycling factor                                                                                                              | 2.44   | 0.000 |
| <b>Function unknown/Hypothetical</b>                   |                                                                                                                                        |        |       |
| PFLU1813                                               | hypothetical protein                                                                                                                   | -14.73 | 0.000 |
| PFLU2066                                               | hypothetical protein                                                                                                                   | -4.62  | 0.017 |
| PFLU1032                                               | hypothetical protein                                                                                                                   | 2.10   | 0.000 |
| PFLU3904                                               | hypothetical protein                                                                                                                   | 2.11   | 0.000 |
| PFLU5919                                               | putative lipoprotein                                                                                                                   | 2.17   | 0.000 |
| PFLU5221                                               | hypothetical protein                                                                                                                   | 2.20   | 0.009 |
| PFLU0434                                               | hypothetical protein                                                                                                                   | 3.00   | 0.003 |
| PFLU1460                                               | hypothetical protein                                                                                                                   | 3.89   | 0.049 |
| pyrR                                                   | bifunctional pyrimidine regulatory protein PyrR<br>uracil phosphoribosyltransferase                                                    | -13.14 | 0.008 |
| PFLU1186                                               | hypothetical protein                                                                                                                   | -4.86  | 0.016 |
| PFLU3940                                               | allantoate amidohydrolase                                                                                                              | -3.22  | 0.004 |
| PFLU5795                                               | hypothetical protein                                                                                                                   | 2.04   | 0.027 |
| PFLU4974                                               | hypothetical protein                                                                                                                   | 2.20   | 0.048 |
| PFLU3258                                               | putative ABC transport membrane protein                                                                                                | 2.21   | 0.044 |
| PFLU0627                                               | putative hydrolase                                                                                                                     | 2.26   | 0.007 |
| PFLU4957                                               | hypothetical protein                                                                                                                   | 2.29   | 0.018 |
| phnP                                                   | carbon-phosphorus lyase complex accessory protein<br>putative high-affinity branched-chain amino acid<br>transport ATP-binding protein | 2.45   | 0.000 |
| PFLU3420                                               | putative high-affinity branched-chain amino acid<br>transport ATP-binding protein                                                      | 3.40   | 0.001 |
| PFLU4780                                               | hypothetical protein                                                                                                                   | 3.59   | 0.000 |
| PFLU4049                                               | putative dehalogenase                                                                                                                  | 4.80   | 0.000 |
| PFLU2129                                               | hypothetical protein                                                                                                                   | 6.98   | 0.024 |
| PFLU2398                                               | putative regulatory protein                                                                                                            | 9.27   | 0.000 |
| PFLU2861                                               | putative lipoprotein                                                                                                                   | -∞     | 0.006 |
| PFLU4290                                               | hypothetical protein                                                                                                                   | -∞     | 0.022 |
| PFLU2450                                               | hypothetical protein                                                                                                                   | -18.77 | 0.017 |
| PFLU4555                                               | putative cytochrome C oxidase subunit                                                                                                  | -12.36 | 0.048 |
| PFLU5320                                               | hypothetical protein                                                                                                                   | -12.31 | 0.021 |
| PFLU5939                                               | hypothetical protein                                                                                                                   | -7.23  | 0.000 |
| PFLU1413                                               | putative transporter-like membrane protein                                                                                             | -5.31  | 0.006 |
| PFLU0924                                               | hypothetical protein                                                                                                                   | -3.37  | 0.003 |
| PFLU5205                                               | hypothetical protein                                                                                                                   | 2.02   | 0.042 |
| PFLU1768                                               | hypothetical protein                                                                                                                   | 2.04   | 0.001 |
| PFLU4991                                               | hypothetical protein                                                                                                                   | 2.06   | 0.002 |
| PFLU1700                                               | hypothetical protein                                                                                                                   | 2.15   | 0.000 |
| PFLU3552                                               | hypothetical protein                                                                                                                   | 2.21   | 0.027 |
| PFLU2983                                               | putative lipoprotein                                                                                                                   | 2.26   | 0.001 |

|          |                      |       |       |
|----------|----------------------|-------|-------|
| PFLU2820 | hypothetical protein | 2.32  | 0.000 |
| PFLU1019 | hypothetical protein | 2.39  | 0.024 |
| PFLU1395 | hypothetical protein | 2.45  | 0.000 |
| PFLU3561 | putative lipoprotein | 2.52  | 0.000 |
| PFLU3288 | hypothetical protein | 2.83  | 0.015 |
| PFLU5134 | hypothetical protein | 2.87  | 0.000 |
| PFLU2928 | hypothetical protein | 3.61  | 0.000 |
| PFLU3765 | hypothetical protein | 6.46  | 0.010 |
| PFLU2495 | hypothetical protein | 7.96  | 0.009 |
| PFLUt29  | tRNA-Leu             | 37.43 | 0.000 |
| PFLU0566 | hypothetical protein | 49.17 | 0.000 |

44

45



46 Table S4 : Expression pattern of the putative efflux genes

| Gene     | Fold change | P value  |
|----------|-------------|----------|
| PFLU2929 | 14.85       | <0.00001 |
| PFLU2930 | 14.59       | 0.03     |
| PFLU2931 | 90.27       | 0.06     |
| PFLU3875 | -1.38       | 1.00     |
| PFLU3876 | 2.21        | <0.00001 |
| PFLU3877 | 1.52        | <0.00001 |

47
